# Supplementary material for: Facial Manifestations of Pachydermoperiostosis Treated with Botulinum Toxin Type-A: Report of 3 Cases
Source: PubMed Central journal article supplement — Acta Derm Venereol. Author manuscript; Available in PMC 2018 Jun 9. (PMC5475399; doi:10.2340/00015555-2645), 2017-06-09
Supplement: NIHMS865684-supplement-supplement_1.pdf [file NIHMS865684-supplement-supplement_1.pdf]

**Table SI. Summary of patient characteristics**

| Pat. | Sex/age, years | Facial manifestation                                                       | Digital clubbing | Arthralgia | X-rays                                                          | Facial wrinkle scale |                         |
|------|----------------|----------------------------------------------------------------------------|------------------|------------|-----------------------------------------------------------------|----------------------|-------------------------|
|      |                |                                                                            |                  |            |                                                                 | Before treatment     | 4 weeks after treatment |
| 1    | M/22           | Thickened skin with glabellar furrows                                      | Yes              | Yes        | Subperiosteal new bone formation bilaterally in the extremities | 3                    | 1                       |
|      |                |                                                                            |                  |            |                                                                 | 2                    | 1                       |
|      |                |                                                                            |                  |            |                                                                 | 2                    | 1                       |
|      |                |                                                                            |                  |            |                                                                 | 2                    | 1                       |
| 2    | M/28           | Significant thickened skin on the forehead and glabellar region and eyelid | Yes              | Yes        | Periosteal changes and enlargement of the joints                | 3                    | 2                       |
| 3    | M/26           | Thickened skin on the forehead and glabellar region and acne               | Yes              | Yes        | Periostosis of the long bones                                   | 3                    | 2                       |

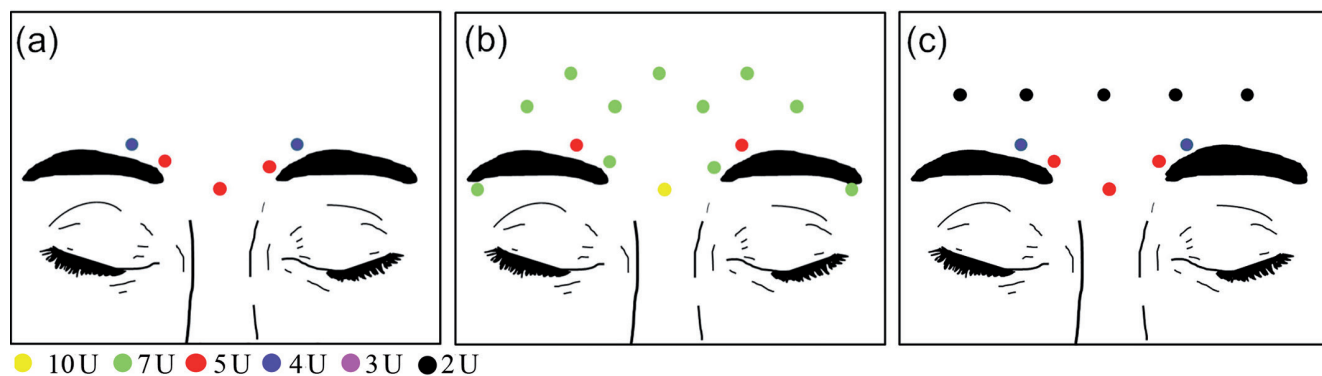

**Fig. S1. Injection sites and doses for patients with PDP.** (a) BTX-A was injected into procerus muscle (single spot, 5U), the *corrugator supercilii* muscles (2 spots, medially at the site of their attachment to the bone using 5U each, and laterally at the skin insertion sites using 4U each) for patient 1. (b) The procerus muscle (single spot, 10U), the *corrugator supercilii* muscles (2 spots, medially at the site of their attachment to the bone using 7U each and laterally at the skin insertion sites using 5U each), forehead (7 intradermal injections along the furrows using 3U each) and the lateral tail of each eyebrow (3U each) for patient 2. (c) Sites and doses in the glabellar region were the same as case 1, 5 intradermal injections along the forehead were given using 2U each for patient 3.
